# Supplementary material for: The Experience of a Tertiary Reference Hospital in the Study of Rare Neurological Diseases
Source: MDPI journal article supplement (doi:10.3390/medicina59020266), 2023-01-30
Supplement: s1 [file s1]

**Table S1** Classification of Rare Neurological Diseases diagnosed per disease category

| <b>DIAGNOSIS</b>                                           | <b>n</b>  | <b>%</b>    |
|------------------------------------------------------------|-----------|-------------|
| <b><i>Neurodegenerative diseases with dementia</i></b>     | <b>80</b> | <b>23</b>   |
| PPA                                                        | 29        | 8.4         |
| FTD                                                        | 34        | 9.9         |
| LBD                                                        | 4         | 1.1         |
| FTD-MND                                                    | 2         | 0.55        |
| Leukodystrophies                                           | 2         | 0.55        |
| RTLA (FTD variant)                                         | 4         | 1.1         |
| CJD                                                        | 5         | 1.4         |
| <b><i>Neurodegenerative diseases with parkinsonism</i></b> | <b>11</b> | <b>3.2</b>  |
| CBD                                                        | 8         | 2.3         |
| Parkinson plus syndrome                                    | 3         | 0.9         |
| <b><i>Neurodegenerative diseases with chorea</i></b>       | <b>9</b>  | <b>2.6</b>  |
| Huntington disease                                         | 9         | 2.6         |
| <b><i>Other rare neurodegenerative diseases</i></b>        | <b>10</b> | <b>3</b>    |
| MSA                                                        | 7         | 2.1         |
| PCA                                                        | 3         | 0.9         |
| <b><i>Rare motor neuron diseases</i></b>                   | <b>64</b> | <b>18.7</b> |
| ALS - MND                                                  | 57        | 16.6        |
| Mills syndrome                                             | 1         | 0.3         |
| MND- Flail arm syndrome                                    | 1         | 0.3         |
| Brown- Vialetto -Van Laere syndrome                        | 1         | 0.3         |
| SMA                                                        | 3         | 0.9         |
| Progressive muscular atrophy                               | 1         | 0.3         |
| <b><i>Rare peripheral neuropathies</i></b>                 | <b>30</b> | <b>8.8</b>  |
| CIDP                                                       | 8         | 2.3         |
| Guillain Barre syndrome                                    | 7         | 2           |
| Charcot Marie Tooth disease                                | 6         | 1.8         |
| Isaacs syndrome                                            | 3         | 0.9         |
| MADSAM                                                     | 2         | 0.6         |
| hATTR                                                      | 2         | 0.6         |
| HNPP                                                       | 1         | 0.3         |
| MMN                                                        | 1         | 0.3         |
| <b><i>Rare diseases of the neuromuscular junction</i></b>  | <b>28</b> | <b>8.2</b>  |
| Myasthenia gravis                                          | 27        | 7.9         |
| Congenital myasthenic syndrome                             | 1         | 0.3         |
| <b><i>Genetic skeletal muscle diseases</i></b>             | <b>19</b> | <b>5.6</b>  |
| Muscular dystrophy                                         | 12        | 3.5         |
| Mitochondrial myopathy                                     | 2         | 0.6         |
| Congenital myotonia                                        | 3         | 0.9         |

|                                                                           |           |            |
|---------------------------------------------------------------------------|-----------|------------|
| Qualitative or quantitative defects of dystrophin                         | 1         | 0.3        |
| Henson-Heyck-Landahn myopathy                                             | 1         | 0.3        |
| <b><i>Rare neuroinflammatory and neuro-immunological disease</i></b>      | <b>19</b> | <b>5.6</b> |
| NMOSD                                                                     | 7         | 2          |
| Autoimmune encephalitis                                                   | 4         | 1.1        |
| MOGAD                                                                     | 3         | 0.9        |
| Paraneoplastic neurologic syndrome                                        | 2         | 0.6        |
| ADEM                                                                      | 1         | 0.3        |
| PML-IRIS                                                                  | 1         | 0.3        |
| IgG4-related pachymeningitis                                              | 1         | 0.3        |
| <b><i>Rare movement disorders</i></b>                                     | <b>10</b> | <b>3</b>   |
| PSP                                                                       | 8         | 2.3        |
| PSP-FTD complex                                                           | 1         | 0.3        |
| Primary orthostatic tremor                                                | 1         | 0.3        |
| <b><i>Rare systemic or rheumatologic disease with CNS involvement</i></b> | <b>11</b> | <b>3.2</b> |
| Behçet disease                                                            | 4         | 1.1        |
| Systemic lupus erythematosus with CNS involvement                         | 3         | 0.9        |
| Giant cell arteritis                                                      | 2         | 0.6        |
| Sarcoidosis                                                               | 1         | 0.3        |
| Sjögren syndrome                                                          | 1         | 0.3        |
| <b><i>Rare vascular diseases of the CNS</i></b>                           | <b>8</b>  | <b>2.3</b> |
| CADASIL                                                                   | 4         | 1.1        |
| Moyamoya disease                                                          | 2         | 0.6        |
| Primary angiitis of the central nervous system                            | 1         | 0.3        |
| Familial cerebral cavernous malformation                                  | 1         | 0.3        |
| <b><i>Rare ataxias</i></b>                                                | <b>7</b>  | <b>2</b>   |
| SCA                                                                       | 1         | 0.3        |
| Friedreich ataxia                                                         | 3         | 0.9        |
| Sporadic adult-onset cerebellar ataxia                                    | 2         | 0.6        |
| Paraneoplastic cerebellar degeneration                                    | 1         | 0.3        |
| <b><i>Rare epilepsies</i></b>                                             | <b>5</b>  | <b>1.5</b> |
| Juvenile myoclonic epilepsy                                               | 1         | 0.3        |
| Mesial temporal lobe epilepsy with hippocampal sclerosis                  | 1         | 0.3        |
| Cerebral malformation with epilepsy                                       | 1         | 0.3        |
| Lafora disease                                                            | 1         | 0.3        |
| Inflammatory and autoimmune disease with epilepsy                         | 1         | 0.3        |
| <b><i>Neurocutaneous syndrome with epilepsy</i></b>                       | <b>6</b>  | <b>1.8</b> |

|                                                  |          |            |
|--------------------------------------------------|----------|------------|
| Tuberous sclerosis complex                       | 3        | 0.9        |
| NF1                                              | 2        | 0.6        |
| Sturge Weber Syndrome                            | 1        | 0.3        |
| <b><i>Acquired skeletal muscle diseases</i></b>  | <b>4</b> | <b>1.2</b> |
| Immune-mediated necrotizing myopathy             | 2        | 0.6        |
| Necrotic myopathy unspecified                    | 1        | 0.3        |
| Polymyositis                                     | 1        | 0.3        |
| <b><i>Rare inborn errors of metabolism</i></b>   | <b>4</b> | <b>1.2</b> |
| MELAS                                            | 2        | 0.6        |
| Pompe disease                                    | 1        | 0.3        |
| Argininemia                                      | 1        | 0.3        |
| <b><i>CNS malformations</i></b>                  | <b>2</b> | <b>0.6</b> |
| Congenital hydrocephalus                         | 2        | 0.6        |
| <b><i>Rare headache</i></b>                      | <b>2</b> | <b>0.6</b> |
| Sporadic hemiplegic migraine                     | 1        | 0.3        |
| Idiopathic intracranial hypotension              | 1        | 0.3        |
| <b><i>Medullar disease</i></b>                   | <b>2</b> | <b>0.6</b> |
| Transverse myelitis                              | 2        | 0.6        |
| <b><i>Rare sleep disorder</i></b>                | <b>1</b> | <b>0.3</b> |
| Narcolepsy                                       | 1        | 0.3        |
| <b><i>Rare nervous system tumor</i></b>          | <b>1</b> | <b>0.3</b> |
| Medulloblastoma                                  | 1        | 0.3        |
| <b><i>Other rare diseases</i></b>                | <b>9</b> | <b>2.6</b> |
| Idiopathic intracranial hypertension             | 3        | 0.9        |
| Cerebellar ataxia and atrophy                    | 1        | 0.3        |
| Congenital cerebellar agenesis                   | 1        | 0.3        |
| Boucher-Näühauser syndrome and cerebellar ataxia | 1        | 0.3        |
| MEN-1 syndrome                                   | 1        | 0.3        |
| Autoimmune autonomic ganglionopathy              | 1        | 0.3        |
| Endocardial fibroelastosis - ischemic stroke     | 1        | 0.3        |

PPA: primary progressive aphasia; FTD: frontotemporal dementia; LBD: lewy-body dementia, MND: motor neuron disease; RTLA: right temporal lobe atrophy; CJD: Creutzfeldt-Jakob disease; CBD: corticobasal degeneration; MSA: multiple system atrophy; PCA: posterior cortical atrophy; CNS: Central Nervous System; ALS- MND: amyotrophic lateral sclerosis -motor neuron disease; SMA: spinal muscular atrophy; CIDP: chronic inflammatory demyelinating polyneuropathy; MADSAM: multifocal acquired demyelinating sensory and motor neuropathy; hATTR: hereditary transthyretin amyloidosis; HNPP: hereditary neuropathy with pressure palsies; MMN: multifocal motor neuropathy; NMOSD: neuromyelitis optica spectrum disorder; MOGAD: myelin oligodendrocyte glycoprotein antibody disease; ADEM: acute disseminated encephalomyelitis; PML-IRIS: progressive multifocal leukoencephalopathy - immune reconstitution inflammatory syndrome; PSP: progressive supranuclear palsy; CADASIL: cerebral autosomal dominant arteriopathy with subcortical infarcts and leukoencephalopathy; SCA: spinocerebellar atrophy; NF1: neurofibromatosis type 1; MELAS: mitochondrial encephalomyopathy, lactic acidosis and stroke-like episodes; MEN-1 multiple endocrine neoplasia type 1; n: number of patients
